1  
2  
3  
4  
5  
6  
7  
8  
9  
10  
11  
12  
13  
14  
15  
16  
17  
18  
19  
20  
21  
22  
23  
24

## Development of a genetically-encoded oxytocin sensor

Neymi Mignocchi<sup>1,3</sup>, Sarah Krüssel<sup>1,2</sup>, Kanghoon Jung<sup>1,2</sup>, Dongmin Lee<sup>4</sup>, Hyung-Bae Kwon<sup>1,2,5\*</sup>

<sup>1</sup>Max Planck Florida Institute for Neuroscience, Jupiter, Florida 33458, USA.

<sup>2</sup>Solomon H. Snyder Department of Neuroscience, Johns Hopkins University School of Medicine, Baltimore, MD 21205, USA.

<sup>3</sup>Department of Biomedical Science and Brain Institute, Charles E. Schmidt College of Medicine, Florida Atlantic University, Jupiter, FL 33458, USA.

<sup>4</sup>Department of Anatomy, College of Medicine, Korea University, Seoul, Republic of Korea

<sup>5</sup>Max Planck Institute of Neurobiology, Martinsried 82152, Germany

\*Correspondence to: Hyung-Bae Kwon  
Solomon H. Snyder Department of Neuroscience  
Johns Hopkins University School of Medicine  
Baltimore, MD 21205, USA.  
Email: [hkwon29@jhmi.edu](mailto:hkwon29@jhmi.edu)

25 **Abstract**

26 Oxytocin (OXT) is a neuropeptide originating in the paraventricular nucleus (PVN) of the  
27 hypothalamus, with a role in influencing various social behaviors. However, pinpointing its  
28 actions only during the time animals are performing specific behaviors has been difficult to  
29 study. Here we developed an optogenetic gene expression system designed to selectively label  
30 neuronal populations activated by OXT in the presence of blue-light, named “OXTR-iTango2”.  
31 The OXTR-iTango2 was capable of inducing gene expression of a reporter gene in both human  
32 embryonic kidney (HEK) cells and neurons in a quantitative manner. *In vivo* expression of  
33 OXTR-iTango2 selectively labeled OXT-sensitive neurons in a blue-light dependent manner.  
34 Furthermore, we were able to detect a subset of dopamine (DA) neurons in the ventral  
35 tegmental area (VTA) that receive OXT activation during social interaction. Thus, we provide a  
36 genetically-encoded, scalable optogenetic toolset to target neural circuits activated by OXT in  
37 behaving animals with a high temporal resolution.

38

39

## 40 **Introduction**

41 Neuromodulation influences animal behavior and perception in space and time.  
42 Neuromodulators are incessantly flowing within a brain or body and adjust neurons to react  
43 differently when responding to the same inputs and can alter the threshold for synaptic plasticity  
44 (S. H. Lee & Dan, 2012; Yagishita et al., 2014). Especially, neuropeptides are small molecules  
45 synthesized and released from neurons and affect activity and signaling of neurons. Thus,  
46 pinpointing their actions only during the time which animals are performing specific behaviors  
47 would be essential to define their roles, but studying neuropeptide functions in behaving animals  
48 has not been investigated much.

49 One of the major difficulties in studying neuropeptide functions *in vivo* is the paucity of  
50 appropriate available tools. Previously, neuromodulator actions were monitored in an indirect  
51 way. One common way is to monitor neuronal activity by doing Ca<sup>2+</sup> imaging or  
52 electrophysiological recording. We were able to measure the activity pattern changes at  
53 individual cells or in a population level. In this way, we may be able to find out significant activity  
54 changes mediated by neuromodulators, but it is very difficult to pinpoint where these changes  
55 are coming from. Another approach is to directly measure neuromodulator release by fast-scan  
56 cyclic voltammetry (FSCV). FSCV can detect endogenous levels of neurotransmitters with high  
57 sensitivity (nanomolar scale) and monitor neurotransmitters in behaving animals in real time  
58 with a fast temporal resolution (~10 Hz) (Howe, Tierney, Sandberg, Phillips, & Graybiel, 2013;  
59 Jennings, 2013). Therefore, quantification is great with this FSCV, but the spatial resolution is  
60 poor due to an inserted carbon fiber electrode in the extracellular space of the target brain.  
61 Furthermore, FSCV is not able to detect neuropeptides such as oxytocin or vasopressin. More  
62 recently, several genetically encoded neuromodulator sensors were developed (Feng et al.,  
63 2019; Jing et al., 2018; Patriarchi et al., 2018; Sun et al., 2018). These sensors enable  
64 spatiotemporally precise measurements of neuromodulators *in vivo*, but because they are not

65 linked to gene expression, it only visualizes signals, but does not allow the manipulation of  
66 target neuron's functions.

67 We recently developed a light-gated method to label and manipulate specific neuronal  
68 populations activated by neuromodulators in a highly temporally precise manner (Lee et al.,  
69 2017). We created an inducible dual protein switch system that is turned on and off by not only  
70 a ligand but also light. We named this technique "iTango2", a light-gated gene expression  
71 system that uses  $\beta$ -arrestin and a light-inducible split tobacco-etch-virus (TEV) protease. The  
72 iTango2 system allows gene expression by both light and ligand, which means neurons that are  
73 activated by neuromodulators can only be labeled when light is illuminated.

74 In this study, we developed a genetically encoded, scalable OXT receptor iTango2 (OXTR-  
75 iTango2). This new optogenetic tool enables selective labeling of OXT sensitive neuronal  
76 population with high spatiotemporal resolution. Furthermore, we can quantify the magnitude of  
77 OXT release in the target brain areas. We confirmed that OXTR-iTango2 selectively induced  
78 gene expression in the presence of OXT and blue light from non-neuronal cells to neurons.  
79 Using this sensor, we labeled a population of DA neurons activated by OXT during social  
80 interaction. Determining the extent of OXT's modulation on a specific neuronal population in a  
81 mammalian brain will uncover many unknowns of OXT functions.

## 82 **Results**

### 83 *Development of OXTR-iTango2*

84 The molecular design of the iTango2 labeling system allows for the replacement of the  
85 expressed GPCRs to label and study other modulatory systems. In this experiment, we cloned  
86 the system to contain the OXTR, and then sequenced it to verify the inclusion of the OXTR  
87 genetic sequence (Material and methods). OXTR-iTango2 system requires two synthetic

88 proteins and their interaction causes the restoration of split TEV protease functions (Figure 1A).  
89 The first protein contains the c-terminal truncated form of OXTR bound to the N-terminus of TEV  
90 (TEV-N). The other protein is beta-arrestin2 protein fused with the C-terminus of the split TEV  
91 ( $\beta$ -arrestin2-TEV-C). When OXT binds to OXTR,  $\beta$ -arrestin2-TEV-C is bound to OXTR, resulting  
92 in the reconstitution of N-TEV and C-TEV protease function. However, in dark condition, TEV  
93 protease cannot recognize its substrates because the TEV cleavage sequence is hidden in the  
94 improved light-inducible dimer (iLID) (Guntas et al., 2015; D. Lee et al., 2017). iLID is an  
95 engineered version of *Avena Sativa* phototropin 1 light-oxygen-voltage 2, (ASLOV2), a protein  
96 highly sensitive to blue-light (Guntas et al., 2015). In a dark condition, TEV is unable to access  
97 its cleavage site, but upon blue light illumination, iLID conformational changes expose the TEV  
98 cleavage sequence, which makes the reconstituted TEV protease recognize the cleavage  
99 sequence and release a tetracycline-controlled transcriptional activator (TetR-VP16) out to the  
100 cytosol. Then, released TetR-VP16 travels to the nucleus and begins transcription of the  
101 reporter gene (Figure 1A).

102 To test the efficiency and reliability of the OXTR-iTango2 system, we expressed the OXTR-  
103 iTango2 constructs (i.e.  $\beta$ -arrestin2-TEV-C-P2A-TdTomato and OXTR-V2tail-TEV-N-AsLOV2-  
104 tTA) in human embryonic kidney (HEK) 293T cells (Figure 1B). In addition, we co-expressed the  
105 secreted alkaline phosphatase (SEAP) gene as a reporter to compare quantitative expression  
106 across conditions. Testing of the OXTR-iTango2 gene reporter system included dark and light  
107 conditions (i.e. 20 minutes of short blue light pulses of 10 s ON/50 s OFF) in the presence and  
108 absence of OXTR agonist OXT. In the dark control, there was no detectable spontaneous gene  
109 expression of the SEAP reporter, suggesting that the reporter gene itself does not cause leaky  
110 expression. Upon blue light illumination, gene expression was increased by OXT in a dose-  
111 dependent manner (Figure 1C). Similarly, the longer blue light was shined, the more genes  
112 were expressed. OXT- and light-dependent gene expression was completely blocked by an

113 OXTR antagonist, L371,257, indicating that gene expression was highly selective to OXTR  
114 activation (Figure 1C).

#### 115 *Verification of OXTR-iTango2 in neurons*

116 To test whether OXTR-iTango2 also works in neurons, we generated adeno-associated virus  
117 (AAV) expressing OXTR-iTango2 constructs and EGFP reporter genes and infected them into  
118 dissociated rat hippocampal neuronal cultures (Figure 2A). Virus-mediated transfection of the  
119 OXTR-iTango2 system was applied to the neuronal cultures at 3 days *in vitro* (DIV), and then  
120 expressed for 7 days before dividing the cultures into varying blue light conditions. 500 nM  
121 concentration of OXT was applied in the absence or the presence of blue light. OXT in dark  
122 condition did not cause gene expression significantly, but upon blue light illumination, robust  
123 gene expression was made ( $F(2, 1) = 23.13, p < 0.001$ ) (Figure 2B). Although blue light was  
124 shined, EGFP expression remained negligible when OXT was not applied to the cultured  
125 neurons. Thus, OXTR-iTango2 allows selective labeling of neurons activated by OXT only in the  
126 blue light condition with a high signal-to-noise ratio (SNR).

#### 127 *In vivo labeling of an oxytocin-sensitive neuronal population*

128 We further tested the efficacy of OXTR-iTango2 *in vivo*. Previous studies showed that OXT  
129 neurons within the paraventricular nucleus (PVN) of the hypothalamus innervate their axons to  
130 DA neurons in the ventral tegmental area (VTA), playing a key role in social behaviors (Charlet  
131 & Grinevich, 2017; Hung et al., 2017; Tang et al., 2014; Xiao, Priest, & Kozorovitskiy, 2018;  
132 Xiao, Priest, Nasenbeny, Lu, & Kozorovitskiy, 2017). We first confirmed the PVN-OXT neuronal  
133 axonal projections to VTA-DA neurons through anterograde tracing by expressing AAV<sub>1</sub>-Flex-  
134 EGFP into the PVN of OXT-Cre mice (Figure 3A). Sagittal and coronal brain section images  
135 clearly demonstrated direct axonal projections from the PVN-OXT neurons to the VTA-DA  
136 neurons (Figure 3B).

137 To determine whether OXTR-iTango2 can reliably label neuronal populations *in vivo* with  
138 endogenous OXT release, we expressed OXTR-iTango2 viral constructs (AAV<sub>1</sub>-hSYN-OXTR-  
139 V2 tail-TEV-N-AsLOV2-tTA, AAV<sub>1</sub>-hSYN-β-Arrestin2-TEV-C-P2A-TdTomato, and AAV<sub>1</sub>-hSYN-  
140 TRE-EGFP) into the VTA, and AAV-dFlox-ChR2(H134R)-mCherry (ChR2-mCh) into the PVN of  
141 OXT-Cre mice (Figure 4A). Viral injections in both the VTA and PVN were administered in the  
142 right hemisphere. We also implanted an optic cannulae to directly shine blue-light in the VTA of  
143 mice. In this condition, blue light illumination in the VTA simultaneously triggers OXT release  
144 from PVN-OXT terminals and activates OXTR-iTango2-dependent gene expression. As  
145 expected, blue light illumination (5 s ON/15 s OFF, for 45 min) significantly induced the  
146 expression of the EGFP reporter gene ( $F_{2, 515.6} = 144.5$ ,  $p < 0.0001$ ) (Figure 4B-4D), with only a  
147 marginal expression of EGFP observed in the light and OXT negative control groups (i.e. dark  
148 condition and light only condition) (Figure 4B-4D). These results indicate that OXTR-iTango2  
149 constructs do not produce background gene expression of the EGFP reporter gene in the  
150 absence of OXT ligand or blue-light. Thus, our results reconfirmed that OXTR-iTango2 is a  
151 reliable tool to selectively label OXT sensitive neuronal populations in response to the release of  
152 endogenous OXT in the presence of blue-light.

### 153 *Selective labeling of a subset of neurons during social interaction*

154 OXT is a neuropeptide serving as a neuromodulator in the brain affecting a wide range of social  
155 behaviors (Bielsky & Young, 2004; Caldwell, Aulino, Rodriguez, Witchey, & Yaw, 2017;  
156 Cavanaugh, Huffman, Harnisch, & French, 2015; de Jong & Neumann, 2018; Feldman,  
157 Monakhov, Pratt, & Ebstein, 2016; Love, 2014; M. & A., 2018; Numan & Young, 2016; Sanchez-  
158 Andrade & Kendrick, 2009). OXT affects both positive (e.g. trust, maternal behaviors, pair  
159 bonding, and partner preference) and negative (e.g. aggression) social interactions and  
160 behaviors (Bielsky and Young, 2004; Caldwell et al., 2017; Cavanaugh et al., 2015; de Jong and  
161 Neumann, 2018; Feldman, 2017; Gamal-Eltrabily and Manzano-Garcia, 2018; Love, 2014;

162 Numan and Young, 2016; Sanchez-Andrade and Kendrick, 2009). Impaired social interactions  
163 skills are a great determinant of various neurophysiological disorders such as autism,  
164 depression, and social anxiety disorders (Gunaydin et al., 2014). Manipulating OXT release in  
165 the brain affects social interaction behaviors by modulating DA neurons in the VTA (Hung et al.,  
166 2017; Xiao et al., 2017). However, it is presumed that OXT was not acting all neurons equally.  
167 There should be a neuronal population that are activated by OXT stronger than others during a  
168 specific period of behavior. The patterns and the magnitude of OXT activation during social  
169 interaction will be important for understanding circuits and algorithms of OXT-mediated  
170 behaviors.

171 To detect OXT-sensitive neurons, we injected viral solution containing OXTR-iTango2 mixed  
172 with an EGFP reporter in the VTA. A modified experienced-dependent social conditioning  
173 protocol (ESCP) was adopted as a social behavioral task (Hung et al., 2017). In this task, we  
174 first assessed if experimental mice have a preferred side by letting them explore freely in the  
175 cage (Day 1). Then we put an interacting mouse to the non-preferred side, so we can ensure  
176 that social stimuli the experimental mouse receives is mainly caused by another interacting  
177 mouse not by internal preference (Figure 5A). On day 2, experimental mice were placed in the  
178 middle chamber of a three chamber apparatus, where there was a juvenile mouse in one of the  
179 two side chambers, and the other side chamber contained a toy mouse. Experimental mice  
180 were conditioned to either a social environment (i.e. juvenile mouse encounter) or a non-social  
181 environment (i.e. toy mouse) by allowing them to enter the designated side of the chamber for  
182 three 10-minute periods with 5-minute intervals in between each period (the other side chamber  
183 remained closed). Each side chamber contained different types of flooring to induce the mouse  
184 to associate room environment to the social vs nonsocial environment (Figure 5A). On day 3,  
185 we turned on blue light whenever the experimental mouse enters the social chamber side. A  
186 whole test session was four 5-min trials with 2-min habituation periods in the middle chamber



187 before each trial. When the mouse stayed in the social side for several minutes, we repeated  
188 blue light on/off cycles (3 s ON/12 s OFF) during the stay (Blue + Social). In one control  
189 experiment, we performed the same social interaction task, but blue light was not turned on  
190 (“Social only”). To ensure that OXT-sensitive neurons are labeled by social interaction, another  
191 control experiment was performed where the same blue light procedure was normally applied,  
192 when mice entered the toy mouse chamber side (“Blue only”).

193 Behavior results showed that mice spent less time in a toy mouse chamber side, suggesting  
194 that social experience during the conditioning (Day 2) triggered social reward learning on the  
195 next labeling day (Figure 5B). Due to the time difference, we increased the total duration of  
196 sessions in the “Blue only” condition, such that total blue light exposure time was matched. We  
197 found that EGFP reporter signals were significantly increased in the “Blue + Social” group  
198 compared to the “Social only” or the “Blue only” group (Figure 5C). The number of neurons  
199 expressing EGFP was also increased in the “Blue + Social” group. These data suggest that  
200 higher amount of OXT was released during social interaction and impacted the broader area of  
201 the VTA neurons. Thus, OXTR-iTango2 would be a useful technique that can quantify the OXT  
202 release in live animals and capture the specific ensemble of neurons related to OXT-mediated  
203 functions in space and time.

## 204 **Discussion**

205 The hormone OXT plays a central role in the development of motivated social behaviors  
206 including mate bonding and preference, mother/offspring bonding, aggression and sexual  
207 behavior (Bielsky & Young, 2004; Cavanaugh et al., 2015; Feldman & Bakermans-Kranenburg,  
208 2017; Love, 2014; M. & A., 2018; Numan & Young, 2016; Sanchez-Andrade & Kendrick, 2009).  
209 The vast concentration and distribution of OXTR throughout the mesocorticolimbic DA pathway

210 (Peris et al., 2017; Shahrokh, Zhang, Diorio, Gratton, & Meaney, 2010) suggests that OXT has  
211 a role in influencing rewarding and motivated social behaviors.

212 In this study, we aim to develop a genetically encoded, scalable OXT sensor that can visualize  
213 neuronal population activated by OXT in the OXT-DA pathways involved in social rewards in  
214 response to learned social stimuli. This new optogenetic tool would enable selective labeling of  
215 OXT sensitive neuronal population in high spatiotemporal resolution. Furthermore, developing a  
216 way to detect OXT-sensitive neurons will be beneficial for many investigators who want to use  
217 this technique in their studies.

218 Initially, we screened our newly cloned OXTR-iTango2 in HEK293T cell cultures and confirmed  
219 gene expression of a reporter gene is dependent on the presence of OXT and blue-light  
220 exposure. The next set of experiments was performed in neural cultures to induce the  
221 expression of an EGFP reporter gene under blue light and OXT conditions with results showing  
222 OXTR's efficacy in translating OXT and blue-light dependent conditions into significantly  
223 increases of EGFP reporter expression. After this successful labeling of neuronal cultures, we  
224 set to test OXTR-iTango2 *in vivo* once we confirmed OXT-neural projections (PVN-OXT) onto  
225 VTA-DA neurons, and determined its ability to induce gene expression with endogenous OXT.  
226 Our *in vivo* experiments provided visual evidence of the reliability of OXTR-iTango2 to label  
227 OXT-sensitive cell populations (VTA-DA neurons) with a high spatial and temporal resolution in  
228 the combined presence of endogenous OXT and blue-light.

229 Altogether, our *in vitro* and *in vivo* experiments examining the efficacy and reliability of this  
230 newly developed OXT-sensor, OXTR-iTango2, suggests that it is a promising tool that can be  
231 used to dissect neural circuits involved in OXT-influenced mammalian behaviors.

232

233

234

## 235 **Materials and Methods**

### 236 *Construction of OXTR-iTango2*

237 To generate CMV::HA-OXTR-V2Tail-TEN-V-iLID1-TetR, we first PCR amplified the OXTR  
238 sequence (Addgene, #66467) to contain Clal restriction enzyme sites at each end. The  
239 amplified OXTR product and CMV-DRD2-iTango2 construct (D. Lee et al., 2017) were both  
240 digested with the Clal restriction enzyme. Then, we ligated the digested OXTR-PCR product  
241 into the iTango2 backbone to generate the final CMV-OXTR-iTango2 DNA product. OXTR-  
242 iTango2 was then sequenced (Eurofin Genomics) to confirm the presence of OXTR within the  
243 construct. All reagents and enzymes used for cloning were purchased from New England  
244 Biolabs.

### 245 *HEK293T cell culture preparation, DNA transfections, and blue-light exposure*

246 Human Embryonic Kidney (HEK) 293T cells were acquired from the American Type Culture  
247 Collection (ATCC). These cells were chosen for initial testing of OXTR-iTango2 because they  
248 do not possess neuronal OXTRs or channels, which means that they maintain an environment  
249 to detect effects caused by transfected neuronal proteins. Large batches of HEK293T cells were  
250 grown in high-glucose Dulbecco's Modified Eagle's Medium (DMEM) (Gibco) with 1% penicillin-  
251 streptomycin (Invitrogen) and 10% FBS (Gibco, 10438-018), while maintained in incubated  
252 conditions at 37°C and 10% CO<sub>2</sub>. Experiments required the preparation of 24-well plates coated  
253 with a 1mg/ml poly-D-lysine hydrobromide (Sigma-Aldrich, P0899) solution for two hours and  
254 washed off with distilled water before cell plating. Batches of HEK293T cells were then treated  
255 with 0.25% trypsin (Gibco, 25200) for 2 minutes to detach them from the surface of the plates  
256 used to grow them. The detached cells were collected and then counted to plate a total of 2.0 X  
257 10<sup>5</sup> cells per 12-mm PDL coated well. 24 hours after plating, a Calcium Phosphate Transfection  
258 kit (Clontech) was used to transfect cells with a mixture of OXTR-iTango2 DNA plasmid vectors  
259 with a secreted alkaline phosphatase (SEAP) enzyme reporter gene (4:1:4 ratio; OXTR-TEV-N-

260 iLID1-tTA,  $\beta$ -Arrestin2-TEV-C, TRE-SEAP). The OXTR-iTango2 plasmid vectors were first  
261 slowly added into 2x HEPES-buffered saline and incubated for 1 hour to precipitate. The  
262 precipitated solution was then added into each well in equal amounts. On the third day,  
263 HEK293T cells received various concentrations of OXT and/or L371,257 (OXTR antagonist)  
264 before exposing them to blue-light illumination with a 465-nm-wavelength blue LED array (LED  
265 Wholesalers) at an interval time of 10 s ON/50 s OFF. Blue-light interval was controlled  
266 automatically by a high-accuracy digital electronic timer (GraLab, model 451). The LED array  
267 was located inside of an incubator set to 37°C and 10% CO<sub>2</sub>, and we placed a clear and empty  
268 plate with a height of 2-cm between the LED light source and the cell cultures. We used a power  
269 meter (Thorlabs, Inc, PM100D) to measure the power of the blue-light and set it to 1.7 mW. The  
270 dark condition was achieved by covering the plate with aluminum foil. Media changes were  
271 performed under a dim red lighting. 48 hours after blue-light exposure, we measured for gene  
272 expression of the reporter SEAP enzyme.

### 273 *SEAP chemoluminescence assay*

274 We used the secreted embryonic alkaline phosphatase (SEAP) chemoluminescent assay to  
275 quantify gene expression by OXTR-iTango2 in HEK293T cells. 40  $\mu$ L medium samples from  
276 each cell-containing well in the various OXT concentrations and blue-light conditions were  
277 collected and placed in 96-well plates. Samples were placed inside of a 50-60°C incubator for  
278 10 minutes to inhibit the activity of endogenous alkaline phosphatase before adding a mix of  
279 SEAP substrates and L-homoarginine. We set a microplate reader (Molecular Devices,  
280 SpectraMax Plus 384) to 37°C and measured the chemoluminescence of the samples at 405  
281 nm every 30 seconds for a total of 2 hours. The reagents used to run the assay were acquired  
282 from InvivoGen. We used SoftMax Pro 5.4.1 (Molecular Devices) to measure and calculate  $V_{\max}$   
283 calculations for all samples.

284 *Dissociated rat hippocampal neuron culture preparation, DNA transfections, and blue-light*  
285 *exposure*

286 Primary dissociated neuronal cultures were performed as described in previous literature (D.  
287 Lee et al., 2012). To briefly describe the process, CD IGS rat hippocampus (embryonic day 18-  
288 19) were quickly dissected and digested in 0.25% trypsin-EDTA (Invitrogen) at 37°C for 8-10  
289 minutes. Trypsin-EDTA was then removed, and the hippocampal brain tissue was gently  
290 triturated ~10-15 times using a 100-1,000  $\mu$ L pipette tip. 12-mm PDL-coated coverslips  
291 (Neuvitro) were placed on 24-well plates, and dissociated cells were counted to divide and add  
292  $10^5$  cells to each coverslip containing well. The medium used to plate neurons consisted of  
293 neurobasal medium (Invitrogen) with 1% FBS (Thermo Fisher Scientific), 1% Glutamax  
294 supplement (Gibco), and 2% B27 supplement (Gibco). Every 3-4 days, one-half of the media  
295 was replaced with freshly prepared medium lacking FBS. On DIV 3, cultures were infected with  
296 diluted (1:10) OXTR-iTango2 viral constructs (1:1:2 ratio; AAV<sub>1</sub>-hSYN-OXTR-TEV-C-P2A-iLiD-  
297 tTA, AAV<sub>1</sub>-hSYN- $\beta$ -Arrestin2-TEV-N-P2A-TdTomato, AAV<sub>1</sub>-TRE-EGFP). A week later (DIV 10),  
298 varying concentrations of OXT (Tocris, Cat #: 1910) and/or L-371,257 (Tocris, Cat #: 2410)  
299 were added to the neuronal cultures and illuminated with blue light using the same time intervals  
300 and equipment described above for varying periods of time (5 min, 20 min, and 60 min). After  
301 the light protocol was completed, the medium was completely replaced with new medium to  
302 remove OXT and/or L-371,257. On DIV 12, all neurons were fixed with 4% paraformaldehyde  
303 for imaging.

304 *Animals*

305 OXT-IRES-Cre (OXT-Cre) heterozygous mice (6-10 weeks old, Jackson Laboratory, stock  
306 #:024234) and C57BL/6J (Jackson Laboratory, Cat #:664) were used for experiments. Control  
307 and test group animals were randomly chosen for social behavior experiments. All of the  
308 experimental protocols complied with the National Institute of Health guidelines, and approved

309 by the Max Planck of Florida Institute for Neuroscience Institutional Animal Care and Use  
310 Committee and the Johns Hopkins University Animal Care and Use Committee.

311 *Adeno-associated viral constructs*

312 AAV<sub>1</sub>-hSYN-OXTR-TEV-C-P2A-iLiD-tTA plasmid was first cloned in the laboratory and then  
313 sent to ViGene Bioscience for virus production. All other viral constructs were directly purchased  
314 or produced from the ViGene Bioscience. The list of viruses are as follows: (1) AAV<sub>1</sub>-hSYN-  
315 OXTR-TEV-C-P2A-iLiD-tTA, (2) AAV<sub>1</sub>-hSYN- $\beta$ -Arrestin2-TEV-C-P2A-TdTomato (Addgene Cat  
316 #: 89873), (3) AAV<sub>1</sub>-TRE-EGFP (Addgene Cat #: 89875), (4) AAV<sub>1</sub>-dFlox-ChR2(H134R)-  
317 mCherry (Addgene Cat #: 20297).

318 *Animal surgeries and stereotactic viral injections*

319 Mouse brains were injected with AAV viral solutions using a stereotactic setup (Kopf  
320 instruments). Mice were first fully anesthetized with a ketamine (80 mg/Kg) and xylazine  
321 (12.5mg/kg) (Sigma-Aldrich) cocktail, administered through an i.p. injection. Petroleum ointment  
322 (Puralube Vet Ophthalmic Ointment) was administered to both eyes to maintain moisture and  
323 prevent drying during surgery. Before performing a craniotomy, each mouse had the hair on its  
324 head (i.e. surgical region) removed using hair-remover lotion (Nair, Church & Dwight). Mice's  
325 head was then fixed to the stereotactic setup with the use of an ear bar and a nose clamp. The  
326 surgical region was prepped with 10% betadine solution (Purdue Product LP). The mouse's  
327 body temperature was maintained at 37°C using a homeothermic blanket placed beneath the  
328 surgical space that contained a flexible probe (Harvard Apparatus) during the entirety of the  
329 surgery. Before proceeding, animals were checked to determine if they were fully anesthetized.  
330 We then carefully removed the skin on the head and periosteum with the use of sharp scissors  
331 and scalpel respectively, all within aseptic surgical conditions. The bregma and lambda lines  
332 were used to guide and adjust maintenance of brain area location. We used a handheld drill

333 (Fordom Electric Co.) to make a small burr hole (~0.5 mm in diameter) in the skull where the  
334 pipette containing premixed viral injections were applied. The iTango2 viral injections consisted  
335 of 1:1:2 ratio; AAV<sub>1</sub>-hSYN-OXTR-TEV-C-P2A-iLiD-tTA, AAV<sub>1</sub>-hSYN-β-Arrestin2-TEV-N-P2A-  
336 TdTomato, AAV<sub>1</sub>-TRE-EGFP with a 500 nl injection volume; and dFlox-ChR2(H134R)-mCherry  
337 viral solution (500 nl). The anterograde tracing of OXT neuron projection from the PVN to the  
338 VTA was performed by injecting 400 nl of flex-EGFP into the PVN of OXT-Cre mice. Viral  
339 injections were applied through microinjections with a steady flow and controlled rate of ~0.400-  
340 0.500 nl/min using a constructed glass micropipette (Braubrand, tip size 10-20 μm diameter)  
341 that was connected to a syringe pump device (World Precision Instruments). Glass pipettes  
342 used for microinjections were constructed using a micropipette puller (P-1000, Sutter  
343 Instruments), and the tip of each micropipette was angled and sharpened using a micropipette  
344 grinder (EG-400, Narishige). We used the Mouse Brain Atlas and preliminary injection trials with  
345 fast green dye to determine the injection coordinates of brain areas of interest. The following  
346 coordinates were used for each brain area: (1) VTA, AP -3.2 mm, ML +1.25 mm from bregma,  
347 DV -4.35 mm from the brain's surface at a 10° angle; and (2) PVN, AP -0.75 mm, ML +1.5 mm  
348 from bregma, DV 4.9 mm from the brain's surface at a 15° angle. After the entirety of the  
349 premixed virus was injected into the brain, the tip of the micropipette was held in place for 3  
350 minutes before removal to prevent any backflow of viral solutions.

### 351 *Fabrication and implantation of optic fibers*

352 Optic fibers (Thorlabs, low OH, 200-μm core, 0.37 NA; BFL37-2000) were first cut with a  
353 diamond knife and then inserted into a 1.25-mm-diameter ceramic ferrule (Thorlabs, CFLC230-  
354 10) using a 230-μm bore. We used epoxy (Gorilla Glue Company) to bond the optic fiber to the  
355 ferrule. Once bonded, polishing sandpaper and a grinding puck (Thorlabs) were used to finely  
356 grind both ends of the optic fiber. After each viral injection, the optic fiber was implanted  
357 perpendicularly into the targeted brain area using a cannulae holder (Thorlabs, XCL), and the

358 aid of the stereotactic device. To ensure the security of the optic fiber, dental cement (Parkell,  
359 C&B-Metabond) was applied to adhere the optic fiber to the skull of each animal. Once the  
360 dental cement was dried to its entirety, we removed the cannulae holder from the implanted and  
361 secured optic fiber. An analgesic (buprenorphine, 0.05 mg kg<sup>-1</sup> body weight) was injected  
362 subcutaneously to each animal upon the completion of each surgery to alleviate any  
363 postsurgical pain before returning mice to their home cages for surgical recovery.

#### 364 *In vivo blue-light labeling*

365 After surgery, mice were allowed to recover from virus injections and optic-fiber implantations  
366 for 17-19 days before optogenetic manipulation was performed. Blue-light at ~10mW power was  
367 applied with the use of a 473-nm laser (Changchun New Industries Optogenetic Technology,  
368 MBL-FN-473). Blue-light was applied in a 5 s ON/15 s OFF interval for a total of 45 minutes  
369 through the implanted optic fiber (Thorlabs, 200- $\mu$ m core, 0.37 NA). We controlled the timing of  
370 the light delivery using MATLAB (Mathworks) to generate a custom code.

#### 371 *Experience-dependent social conditioning protocol (ESCP) training and labeling using OXTR- 372 iTango2*

373 The ESCP protocol was adapted from Hung et al. (2017). After animals underwent surgery for  
374 viral injections and optic-fiber implantation, they were allowed to recover for 17-22 days before  
375 undergoing behavior training and OXTR-iTango2 dependent labeling. One week before the  
376 beginning of testing, mice were placed in individual cages and cages were placed in a reverse-  
377 cycle room to ensure activity and motivation during the trial days.

378 On day 1 (D1) of training, pre-conditioned animals were placed in a 3-social chamber with two  
379 different flooring textures in each side chamber (sandpaper vs a metal wire sheet) to determine  
380 if they had a preferred texture. D1 was performed to decrease any intrinsic differences. Animals  
381 were allowed to freely move in the chamber for 20 minutes until they reached a 65-70%



382 preference to one texture. After establishing their baseline preference between the textures of  
383 each side chamber, we socially conditioned the animals to the side chamber with their least  
384 preferred texture on day 2 (D2). D2 conditioning was composed of a 2-minute habituation period  
385 before opening their assigned side chamber and allowing animals 10 minutes to explore the  
386 chamber now containing a social stimulus (juvenile mouse, P21-35). The habituation periods  
387 involved the animals being enclosed in the middle chamber without the ability to see through the  
388 walls to each side chamber. The conditioning protocol was repeated for a total of 3 times with  
389 the purpose of conditioning mice to the environment (i.e. floor texture) that contained a  
390 rewarding social stimulus. On day 3 (D3), animals underwent testing (i.e. familiar social  
391 exposure or a toy mouse) and blue-light labeling of OXT sensitive VTA-DA neurons. Testing  
392 was composed of four- 5 min trials with 2-minute habituation periods in the middle chamber  
393 before each trial. Animals were given access to their now conditioned side after each  
394 habituation period was completed and blue-light illumination was applied for 3 seconds  
395 immediately upon entry of side chamber (i.e. encounter with conditioned stimulus, floor texture)  
396 at ~13-15mW power using a 473-nm laser (Changchun New Industries Optogenetic  
397 Technology, MBL-FN-473). Optogenetic stimulation was applied every time the mouse entered  
398 the side chamber during the each 5-minute trial session or 3 s ON/12 s OFF when the mouse  
399 was staying in the side chamber for longer than 15 seconds. In order to match the total duration  
400 of blue light exposure between “Blue only” and “Blue + Social” groups, trial sessions were  
401 repeated more for the “Blue only” group. The onset of the optogenetic stimulation was controlled  
402 by monitoring each animal’s behaviors in real-time through a Noldus Ethovision camera. 48  
403 hours after blue-light illumination, mice underwent transcatheter perfusions after deeply  
404 anesthetizing them with a ketamine and xylazine mixture to preserve and dissect brains for  
405 confocal imaging (Zeiss LSM880).

406 *Immunocytochemistry*

407 EGFP and TdTomato staining for neuronal cultures was performed as follows: (1) individual  
408 fixed cultures were rinsed three times in PBS, pH 7.4; (2) cultures were blocked in 10% normal  
409 donkey serum (Jackson ImmunoResearch, 017-000-121) and 0.1% Triton-X for 30 minutes and  
410 inserted into a shaking incubator set to 23°C at 120-130RMP; (3) cultures were incubated with a  
411 mixture of RFP antibody pre-absorbed (1:1000 in blocking reagent, Rockland antibodies &  
412 assays, 600-401-379) and GFP antibody (1:1000 in blocking reagent, Abcam, ab13970) for 90  
413 minutes in a shaking incubator at room; (4) cultures were rinsed in PBS three times with 5-  
414 minute incubation periods each time; (5) cultures were incubated in Cy3-AffiniPure Donkey Anti-  
415 Rabbit IgG (H+L) (1:500, Jackson ImmunoResearch, 711-165-152) and Alexa Fluor 488  
416 AffiniPure Donkey Anti-Chicken IgG (H+L) (1:500, Jackson ImmunoResearch, 703-545-155) for  
417 30 minutes in a shaking incubator set to room temperature; (6) cultures were again rinsed with  
418 PBS three times with 5-minute incubation periods. All cultures were imaged with a confocal  
419 microscope (Zeiss LSM880).

#### 420 *Statistics*

421 The statistical significance of the SEAP expression in HEK293T cell cultures was calculated  
422 using a two-way ANOVA post-hoc Bonferroni test in Origin 2020 software. The statistical  
423 significance of the G/R of neuronal cell cultures was also calculated using a two-way ANOVA  
424 with post-hoc Bonferroni test in Origin 2020 software. Comparison of G/R labeling *in vivo* was  
425 performed with a nonparametric Welch's one-way ANOVA Test. Single, double, and triple  
426 significance asterisks present \* $P < 0.05$ , \*\* $P < 0.01$ , and \*\*\* $P < 0.005$ .

427

#### 428 **Acknowledgements**

429 We thank members of the Kwon laboratory for helpful discussions. This work was supported by  
430 Johns Hopkins University School of Medicine (to H-B.K.), Max Planck Florida Institute for

431 Neuroscience (to H-B.K.), the National Institutes of Health Grants R01MH107460 (to H-B.K.),  
432 and DP1MH119428 (to H-B.K).

433 **Competing interests**

434 The authors declare no competing interests.

435

436 **References**

- 437 Bielsky, I. F., & Young, L. J. (2004). Oxytocin, vasopressin, and social recognition in mammals.  
438 *Peptides*, 25(9), 1565–1574. <https://doi.org/10.1016/j.peptides.2004.05.019>
- 439 Bosch, O. J., Nair, H. P., Ahern, T. H., Neumann, I. D., & Young, L. J. (2009). The CRF system  
440 mediates increased passive stress-coping behavior following the loss of a bonded partner in a  
441 monogamous rodent. *Neuropsychopharmacology*. <https://doi.org/10.1038/npp.2008.154>
- 442 Buffington, S. A., Di Prisco, G. V., Auchtung, T. A., Ajami, N. J., Petrosino, J. F., & Costa-  
443 Mattioli, M. (2016). Microbial Reconstitution Reverses Maternal Diet-Induced Social and  
444 Synaptic Deficits in Offspring. *Cell*, 165(7), 1762–1775.  
445 <https://doi.org/10.1016/j.cell.2016.06.001>
- 446 Caldwell, H. K., Aulino, E. A., Rodriguez, K. M., Witchey, S. K., & Yaw, A. M. (2017). Social  
447 context, stress, neuropsychiatric disorders, and the vasopressin 1b receptor. *Frontiers in*  
448 *Neuroscience*, 11(OCT), 1–10. <https://doi.org/10.3389/fnins.2017.00567>
- 449 Cavanaugh, J., Huffman, M. C., Harnisch, A. M., & French, J. A. (2015). Marmosets treated with  
450 oxytocin are more socially attractive to their long-term mate. *Frontiers in Behavioral*  
451 *Neuroscience*, 9(OCT), 1–11. <https://doi.org/10.3389/fnbeh.2015.00251>
- 452 Charlet, A., & Grinevich, V. (2017). Oxytocin Mobilizes Midbrain Dopamine toward Sociality.  
453 *Neuron*. <https://doi.org/10.1016/j.neuron.2017.07.002>
- 454 de Jong, T. R., & Neumann, I. D. (2018). Oxytocin and aggression. In *Current Topics in*  
455 *Behavioral Neurosciences*. [https://doi.org/10.1007/7854\\_2017\\_13](https://doi.org/10.1007/7854_2017_13)
- 456 Dölen, G., Darvishzadeh, A., Huang, K. W., & Malenka, R. C. (2013). Social reward requires  
457 coordinated activity of nucleus accumbens oxytocin and serotonin. *Nature*, 501(7466), 179–184.

- 458 <https://doi.org/10.1038/nature12518>
- 459 Ebert, A., & Brüne, M. (2018). Oxytocin and social cognition. In *Current Topics in Behavioral*  
460 *Neurosciences*. [https://doi.org/10.1007/7854\\_2017\\_21](https://doi.org/10.1007/7854_2017_21)
- 461 Feldman, R., & Bakermans-Kranenburg, M. J. (2017). Oxytocin: a parenting hormone. *Current*  
462 *Opinion in Psychology*, 15, 13–18. <https://doi.org/10.1016/j.copsyc.2017.02.011>
- 463 Feldman, R., Monakhov, M., Pratt, M., & Ebstein, R. P. (2016). Oxytocin Pathway Genes:  
464 Evolutionary Ancient System Impacting on Human Affiliation, Sociality, and Psychopathology.  
465 *Biological Psychiatry*, 79(3), 174–184. <https://doi.org/10.1016/j.biopsych.2015.08.008>
- 466 Feng, J., Zhang, C., Lischinsky, J. E., Jing, M., Zhou, J., Wang, H., ... Li, Y. (2019). A  
467 Genetically Encoded Fluorescent Sensor for Rapid and Specific In Vivo Detection of  
468 Norepinephrine. *Neuron*, 102(4), 745–761.e8. <https://doi.org/10.1016/j.neuron.2019.02.037>
- 469 Gunaydin, L. A., Grosenick, L., Finkelstein, J. C., Kauvar, I. V., Fenno, L. E., Adhikari, A., ...  
470 Deisseroth, K. (2014). Natural neural projection dynamics underlying social behavior. *Cell*,  
471 157(7), 1535–1551. <https://doi.org/10.1016/j.cell.2014.05.017>
- 472 Guntas, G., Hallett, R. A., Zimmerman, S. P., Williams, T., Yumerefendi, H., Bear, J. E., &  
473 Kuhlman, B. (2015). Engineering an improved light-induced dimer (iLID) for controlling the  
474 localization and activity of signaling proteins. *Proceedings of the National Academy of Sciences*  
475 *of the United States of America*, 112(1), 112–117. <https://doi.org/10.1073/pnas.1417910112>
- 476 Howe, M. W., Tierney, P. L., Sandberg, S. G., Phillips, P. E. M., & Graybiel, A. M. (2013).  
477 Prolonged dopamine signalling in striatum signals proximity and value of distant rewards.  
478 *Nature*, 500(7464), 575–579. <https://doi.org/10.1038/nature12475>
- 479 Hung, L. W., Neuner, S., Polepalli, J. S., Beier, K. T., Wright, M., Walsh, J. J., ... Malenka, R. C.

- 480 (2017). Gating of social reward by oxytocin in the ventral tegmental area. *Science*, 357(6358),  
481 1406–1411. <https://doi.org/10.1126/science.aan4994>
- 482 Jennings, K. A. (2013). A comparison of the subsecond dynamics of neurotransmission of  
483 dopamine and serotonin. *ACS Chemical Neuroscience*, 4(5), 704–714.  
484 <https://doi.org/10.1021/cn4000605>
- 485 Jing, M., Zhang, P., Wang, G., Feng, J., Mesik, L., Zeng, J., ... Li, Y. (2018). A genetically  
486 encoded fluorescent acetylcholine indicator for in vitro and in vivo studies. *Nature*  
487 *Biotechnology*, 36(8). <https://doi.org/10.1038/nbt.4184>
- 488 Lee, D., Creed, M., Jung, K., Stefanelli, T., Wendler, D. J., Oh, W. C., ... Kwon, H. B. (2017).  
489 Temporally precise labeling and control of neuromodulatory circuits in the mammalian brain.  
490 *Nature Methods*, 14(5), 495–503. <https://doi.org/10.1038/nmeth.4234>
- 491 Lee, D., Lee, H. W., Hong, S., Choi, B. Il, Kim, H. W., Han, S. B., ... Kim, H. (2012). Inositol  
492 1,4,5-trisphosphate 3-kinase A is a novel microtubule-associated protein: PKA-dependent  
493 phosphoregulation of microtubule binding affinity. *Journal of Biological Chemistry*, 287(19),  
494 15981–15995. <https://doi.org/10.1074/jbc.M112.344101>
- 495 Lee, S. H., & Dan, Y. (2012). Neuromodulation of Brain States. *Neuron*, 76(1), 209–222.  
496 <https://doi.org/10.1016/j.neuron.2012.09.012>
- 497 Liu, X., Liu, S., Huang, R., Chen, X., Xie, Y., Ma, R., ... Zhang, X. (2018). Neuroimaging studies  
498 reveal the subtle difference among social network size measurements and shed light on new  
499 directions. *Frontiers in Neuroscience*, 12(JUL), 1–6. <https://doi.org/10.3389/fnins.2018.00461>
- 500 Love, T. M. (2014). Oxytocin, motivation and the role of dopamine. *Pharmacology Biochemistry*  
501 *and Behavior*. <https://doi.org/10.1016/j.pbb.2013.06.011>

502 M., G.-E., & A., M.-G. (2018). Role of central oxytocin and dopamine systems in nociception and  
503 their possible interactions: Suggested hypotheses. *Reviews in the Neurosciences*.  
504 <https://doi.org/10.1515/revneuro-2017-0068> LK -  
505 <http://sfx.library.uu.nl/utrecht?sid=EMBASE&issn=03341763&id=doi:10.1515%2Frevneuro->  
506 2017-  
507 0068&atitle=Role+of+central+oxytocin+and+dopamine+systems+in+nociception+and+their+pos  
508 sible+interactions%3A+Suggested+hypotheses&stitle=Rev.+Neurosci.&title=Reviews+in+the+N  
509 eurosciences&volume=29&issue=4&spage=377&epage=386&aualast=Gamal-  
510 Eltrabily&aufirst=Mohammed&aunit=M.&aufull=Gamal-  
511 Eltrabily+M.&coden=RNEUE&isbn=&pages=377-386&date=2018&aunit1=M&aunitm=  
512 Meyer-Lindenberg, A., Domes, G., Kirsch, P., & Heinrichs, M. (2011). Oxytocin and vasopressin  
513 in the human brain: Social neuropeptides for translational medicine. *Nature Reviews*  
514 *Neuroscience*, 12(9), 524–538. <https://doi.org/10.1038/nrn3044>  
515 Numan, M., & Young, L. J. (2016). Neural mechanisms of mother-infant bonding and pair  
516 bonding: Similarities, differences, and broader implications. *Hormones and Behavior*.  
517 <https://doi.org/10.1016/j.yhbeh.2015.05.015>  
518 Parker, K. J., Oztan, O., Libove, R. A., Sumiyoshi, R. D., Jackson, L. P., Karhson, D. S., ...  
519 Hardan, A. Y. (2017). Intranasal oxytocin treatment for social deficits and biomarkers of  
520 response in children with autism. *Proceedings of the National Academy of Sciences of the*  
521 *United States of America*, 114(30), 8119–8124. <https://doi.org/10.1073/pnas.1705521114>  
522 Patriarchi, T., Cho, J. R., Merten, K., Howe, M. W., Marley, A., Xiong, W. H., ... Tian, L. (2018).  
523 Ultrafast neuronal imaging of dopamine dynamics with designed genetically encoded sensors.  
524 *Science*, 360(6396). <https://doi.org/10.1126/science.aat4422>

- 525 Peris, J., MacFadyen, K., Smith, J. A., de Kloet, A. D., Wang, L., & Krause, E. G. (2017).  
526 Oxytocin receptors are expressed on dopamine and glutamate neurons in the mouse ventral  
527 tegmental area that project to nucleus accumbens and other mesolimbic targets. *Journal of*  
528 *Comparative Neurology*. <https://doi.org/10.1002/cne.24116>
- 529 Sanchez-Andrade, G., & Kendrick, K. M. (2009). The main olfactory system and social learning  
530 in mammals. *Behavioural Brain Research*, *200*(2), 323–335.  
531 <https://doi.org/10.1016/j.bbr.2008.12.021>
- 532 Shahrokh, D. K., Zhang, T. Y., Diorio, J., Gratton, A., & Meaney, M. J. (2010). Oxytocin-  
533 dopamine interactions mediate variations in maternal behavior in the rat. *Endocrinology*, *151*(5),  
534 2276–2286. <https://doi.org/10.1210/en.2009-1271>
- 535 Sun, F., Zeng, J., Jing, M., Zhou, J., Feng, J., Owen, S. F., ... Li, Y. (2018). A Genetically  
536 Encoded Fluorescent Sensor Enables Rapid and Specific Detection of Dopamine in Flies, Fish,  
537 and Mice. *Cell*, *174*(2), 481-496.e19. <https://doi.org/10.1016/j.cell.2018.06.042>
- 538 Tang, Y., Chen, Z., Tao, H., Li, C., Zhang, X., Tang, A., & Liu, Y. (2014). Oxytocin activation of  
539 neurons in ventral tegmental area and interfascicular nucleus of mouse midbrain.  
540 *Neuropharmacology*, *77*, 277–284. <https://doi.org/10.1016/j.neuropharm.2013.10.004>
- 541 Xiao, L., Priest, M. F., & Kozorovitskiy, Y. (2018). Oxytocin functions as a spatiotemporal filter  
542 for excitatory synaptic inputs to VTA dopamine neurons. *eLife*, *7*, 1–26.  
543 <https://doi.org/10.7554/eLife.33892>
- 544 Xiao, L., Priest, M. F., Nasenbeny, J., Lu, T., & Kozorovitskiy, Y. (2017). Biased Oxytocinergic  
545 Modulation of Midbrain Dopamine Systems. *Neuron*, *95*(2), 368-384.e5.  
546 <https://doi.org/10.1016/j.neuron.2017.06.003>



547 Yagishita, S., Hayashi-Takagi, A., Ellis-Davies, G. C. R., Urakubo, H., Ishii, S., & Kasai, H.  
548 (2014). A critical time window for dopamine actions on the structural plasticity of dendritic  
549 spines. *Science*, 345(6204), 1616–1620. <https://doi.org/10.1126/science.1255514>

550

551

552 **Figure legends**

553 **Figure 1. Verification of OXTR-iTango2 in HEK293T cells. (A)** Graphical illustration of OXTR-  
554 iTango2 system. **(B)** Schematic of an experimental plan. **(C)** Summary of OXTR-iTango2 test.  
555 Blue light and OXT together lead to robust gene expression in a dose-dependent manner.  
556 Longer blue light illumination resulted in higher gene expression. In the absence of light, even  
557 high concentration of OXT did not induce gene expression. Gene expression was completely  
558 blocked by a selective OXTR antagonist L357,257, indicating resulting gene expression was  
559 mediated by OXT. Error bars represent mean  $\pm$  SEM.

560 **Figure 2. Verification of OXTR-iTango2 in culture neurons. (A)** A list of viral constructs used  
561 for experiments. **(B)** Summary graph demonstrating the expression of EGFP in cultured rat  
562 hippocampal neurons in response to different blue-light exposure times and OXT (500nM). The  
563 ratio of the intensities of green to red fluorescence (G/R/ ratio) was used to measure overall  
564 gene expression of OXTR-iTango2 constructs (two-way ANOVA, post hoc Bonferroni test,  
565 control versus 500 nM OXT) (Dark/Control,  $1.09 \pm 0.15$ ; Dark/500 nM,  $1.71 \pm 0.69$ ; 5 min/Control,  
566  $0.62 \pm 0.21$ ; 5 min/500 nM,  $8.68 \pm 2.02$ ; 20 min/Control,  $1.36 \pm 0.29$ ; 20 min/500 nM,  $15.93 \pm$   
567  $2.00$ ). Squares represent mean and bars represent mean  $\pm$  SEM. **(C)** Representative confocal  
568 images from each condition, showing that the number of EGFP expressing neurons were  
569 increased when blue light was illuminated. White boxes (inset) show enlarged images. Scale  
570 bars, 200  $\mu$ m.

571 **Figure 3. Confirmation of PVN-OXT projections to the VTA. (A)** Diagram of the AAV<sub>1</sub>-Flex-  
572 EGFP administered into the medial section of the PVN of OXT-Cre mice (top left). Confirmation  
573 of EGFP expressing PVN-OXT neurons (top right); Scale bar is 100  $\mu$ m. **(B)** Sagittal view of the  
574 PVN-OXT projections into the VTA (middle left); Scale bar is 2 mm. 10x magnification of sagittal  
575 section showing PVN-OXT projections from the PVN to the VTA (middle right); Scale bar is 1

576 mm. **(C)** A Coronal section view of PVN-OXT in the VTA (bottom left); Scale bar is 1 mm. 10x  
577 magnification of coronal section showing PVN-OXT terminals in the VTA (bottom right); Scale  
578 bar is 100  $\mu$ m.

579 **Figure 4. *In vivo* verification of OXTR-iTango2.** **(A)** Diagram of the viral injections for *in vivo*  
580 verification of OXTR-iTango2. AAV-dFlox-ChR2(H134R)-mCherry was administered into the  
581 medial section of the PVN of OXT-Cre mice. A mixture of OXTR-iTango2 viruses including an  
582 EGFP reporter were unilaterally injected into the right hemisphere along with an optic fiber to  
583 shine blue light and selectively label DA neurons in the transduced hemisphere. **(B)** Summary  
584 graph of gene expression *in vivo*. Dark, 3 mice; light only, 3 mice; OXT and light, 3 mice  
585 (Welch's one-way ANOVA,  $F(2, 515.6) = 144.5, p < 0.0001$ ). Boxes represent the 25<sup>th</sup> and 75<sup>th</sup>  
586 percentiles, and squares represent the mean. Error bars represent mean  $\pm$  SEM. **(C)** EGFP  
587 gene expression in VTA-DA neurons *in vivo*. Blue-light was exposed at a 5 sec ON/15 sec OFF  
588 interval for 45 min to release endogenous OXT and expose blue light for EGFP gene  
589 expression. Merged (top) and green (bottom) channel images presented. Scale bar, 100  $\mu$ m.  
590 Coronal-section view of high magnification VTA images of a mouse expressing both mCherry  
591 and OXTR-iTango2 after blue light exposure. Scale bar 1 mm. **(D)** Gene expression distribution  
592 of VTA-DA neuronal populations. Scatter plots (top panel) of two colors (y-axis: EGFP; x-axis:  
593 TdTomato) and distribution graph (bottom panel) of VTA cells expressing OXTR-iTango2 across  
594 OXT and blue light conditions. Cells analyzed were divided into four quadrants (Green, Yellow,  
595 Black, and Red), with their respective percentage concentration within the total population  
596 analyzed displayed as horizontal histograms. The red dot crossing lines within the graphs  
597 indicates the threshold for defining the quadrants.

598 **Figure 5. Labeling OXT-sensitive DA neurons during social interaction.** **(A)** Diagram of the  
599 experienced-dependent social conditioning protocol (ESCP). This protocol was performed to  
600 label OXT sensitive VTA-DA neurons during social interactions. On Day 1, mice were exposed

601 to social chamber to determine their preferred floor texture on each side chamber. On Day 2,  
602 mice were conditioned to least their preferred side including a social stimulus. On Day 3, testing  
603 day, mice receiving blue light exposure upon entry to conditioned or control side chamber. **(B)**  
604 Preference to a social environment. Quantification of the percent of time spent from all groups  
605 (one-way ANOVA, post-hoc Bonferroni test,  $F(2,11) = 5.89$ ,  $p < 0.05$ ) (Blue only: Mean =  $78.38 \pm$   
606  $8.89$ , 4 animals; Social only: Mean =  $81.05 \pm 4.37$ , 4 animals; Blue + Social: Mean =  $51.55 \pm$   
607  $7.37$ , 6 animals). Error bars represent  $\pm$  SEM. **(C)** Gene expression of EGFP reporter of OXT-  
608 sensitive DA neurons. Summary graph of G/R ratio in the VTA (Blue only = 4 mice; Social only =  
609 4 mice; Blue + Social = 6 mice) (Welch's one-way ANOVA,  $F(2,1073) = 249.3$ , post-hoc Games-  
610 Howell,  $p < 0.0001$ ). Boxes show the mean, 25<sup>th</sup> and 75<sup>th</sup> percentiles, and whiskers show the 10<sup>th</sup>  
611 and 90<sup>th</sup> percentiles. **(D)** Labeling of VTA-DA neurons with OXTR-iTango2. High magnification  
612 representative confocal images of VTA neurons expressing OXTR-iTango2 after blue light  
613 exposure. Merged (top) and green (bottom) channel images presented. Scale bar, 100  $\mu$ m. **(E)**  
614 Gene expression distributions of VTA-DA neurons. Scatter plots (top panel) of two colors (y-  
615 axis: EGFP; x-axis: TdTomato) and distribution graph (bottom panel) of VTA cells expressing  
616 OXTR-iTango2 across social environment conditions. Cells analyzed were divided into four  
617 quadrants (Green, Yellow, Black, and Red), with their respective percentage concentration  
618 within the total population analyzed displayed as horizontal histograms. The red dot crossing  
619 lines within the graphs indicate the threshold for defining the quadrants.

## Figure 1

**A**

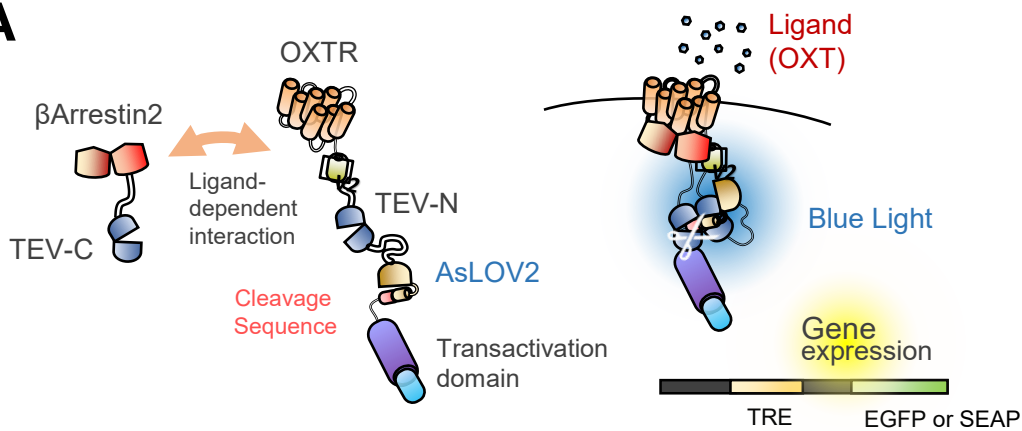

**B**

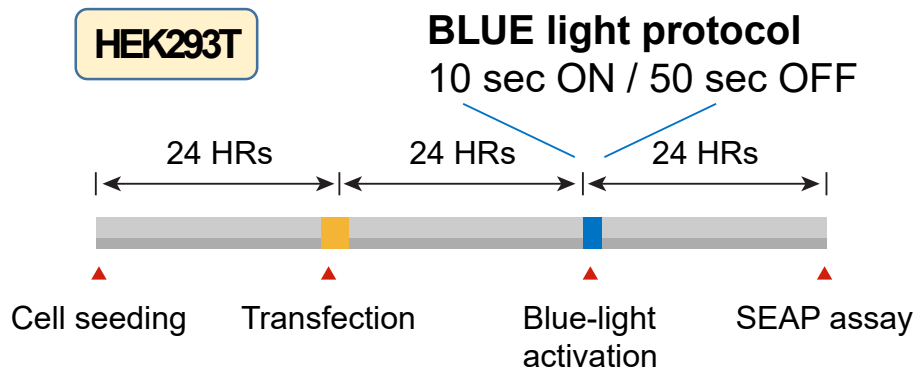

**C**

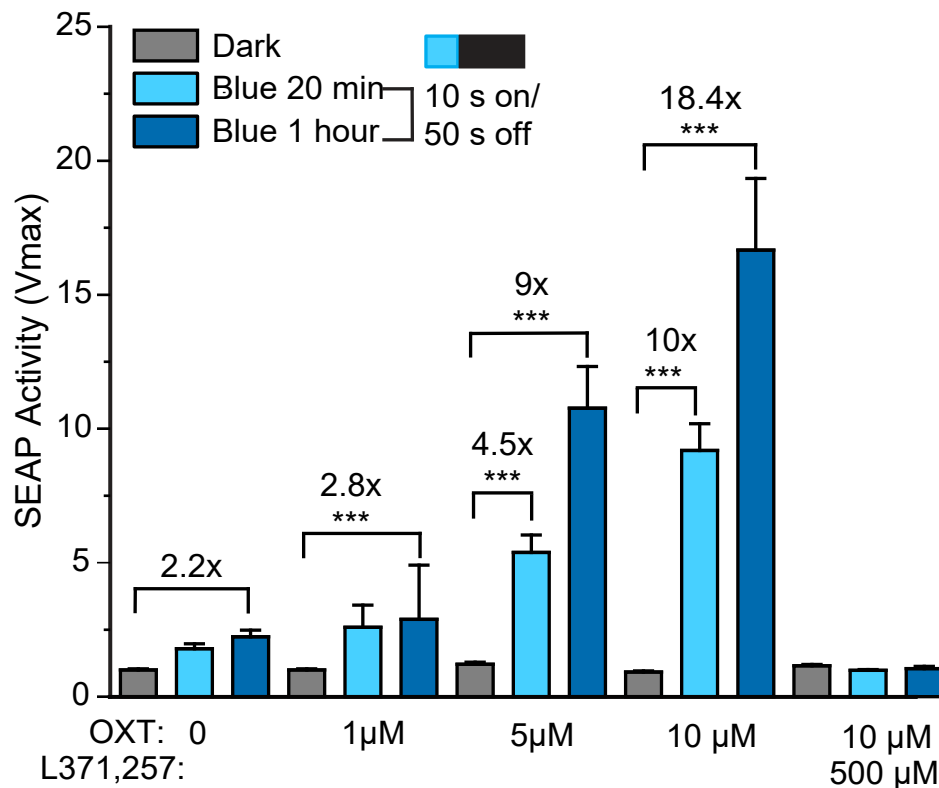

## Figure 2

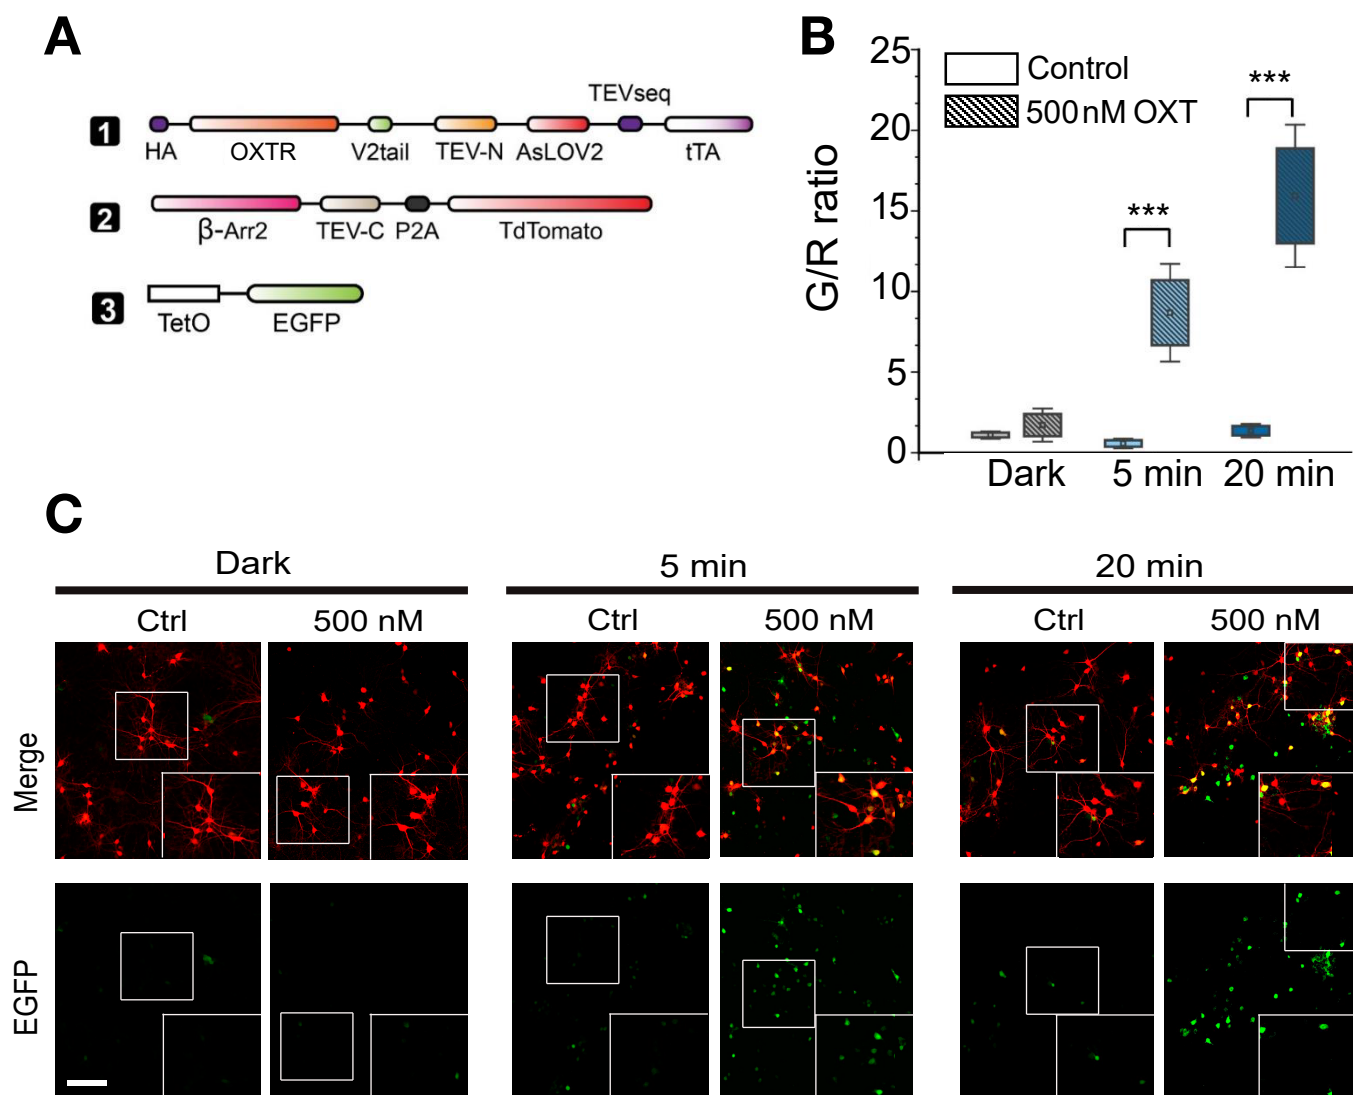

## Figure 3

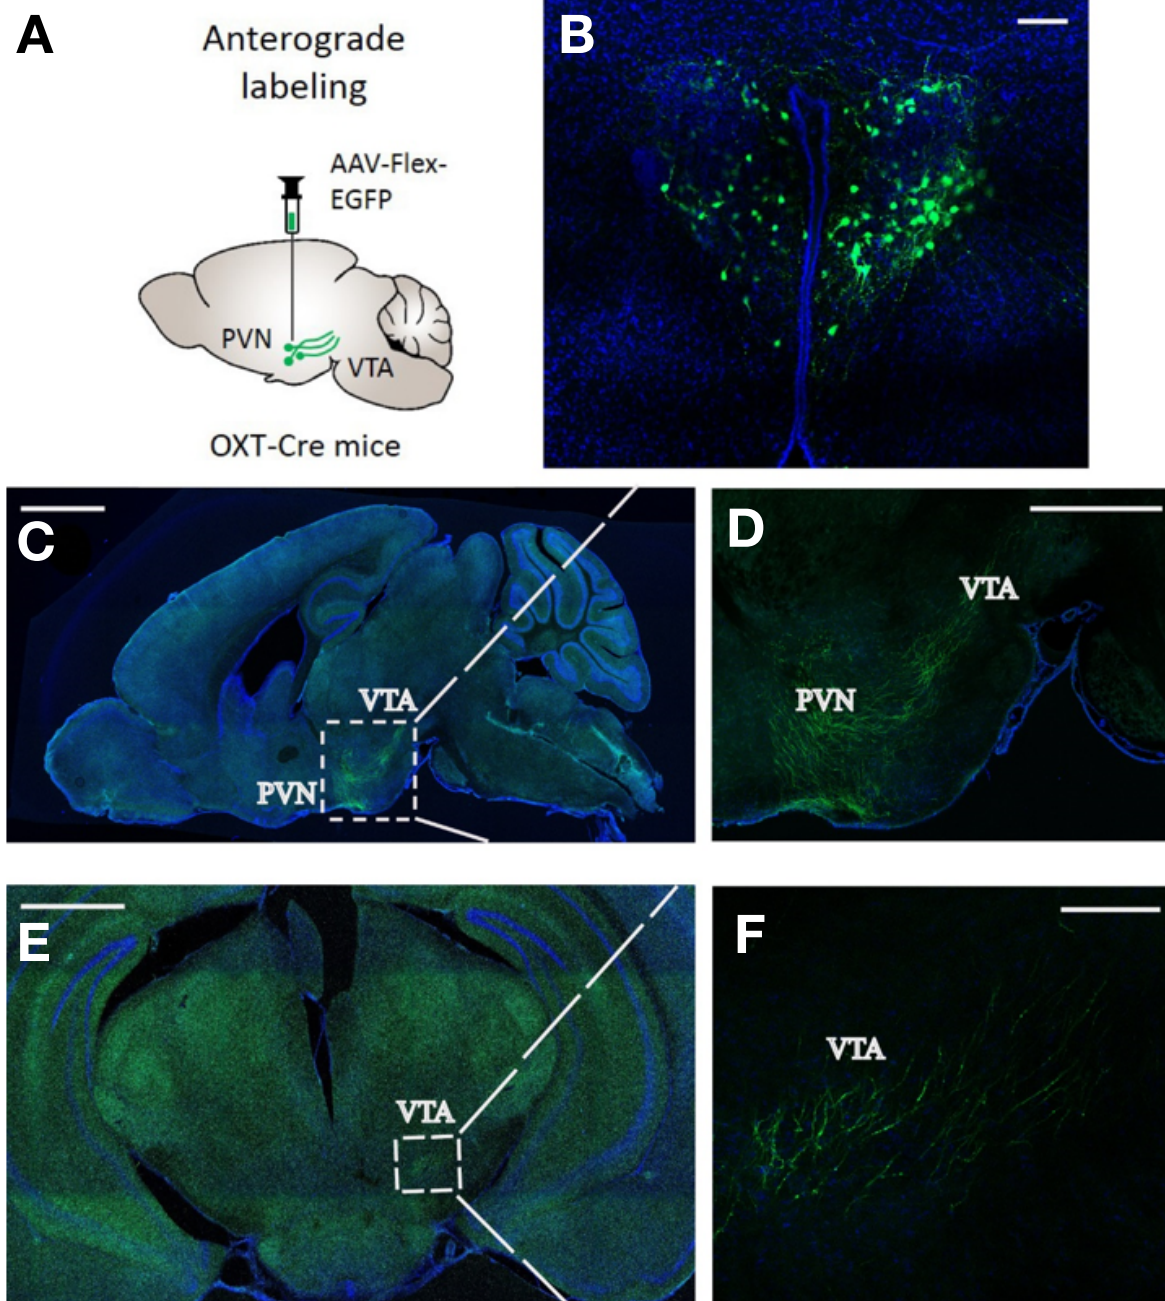

## Figure 4

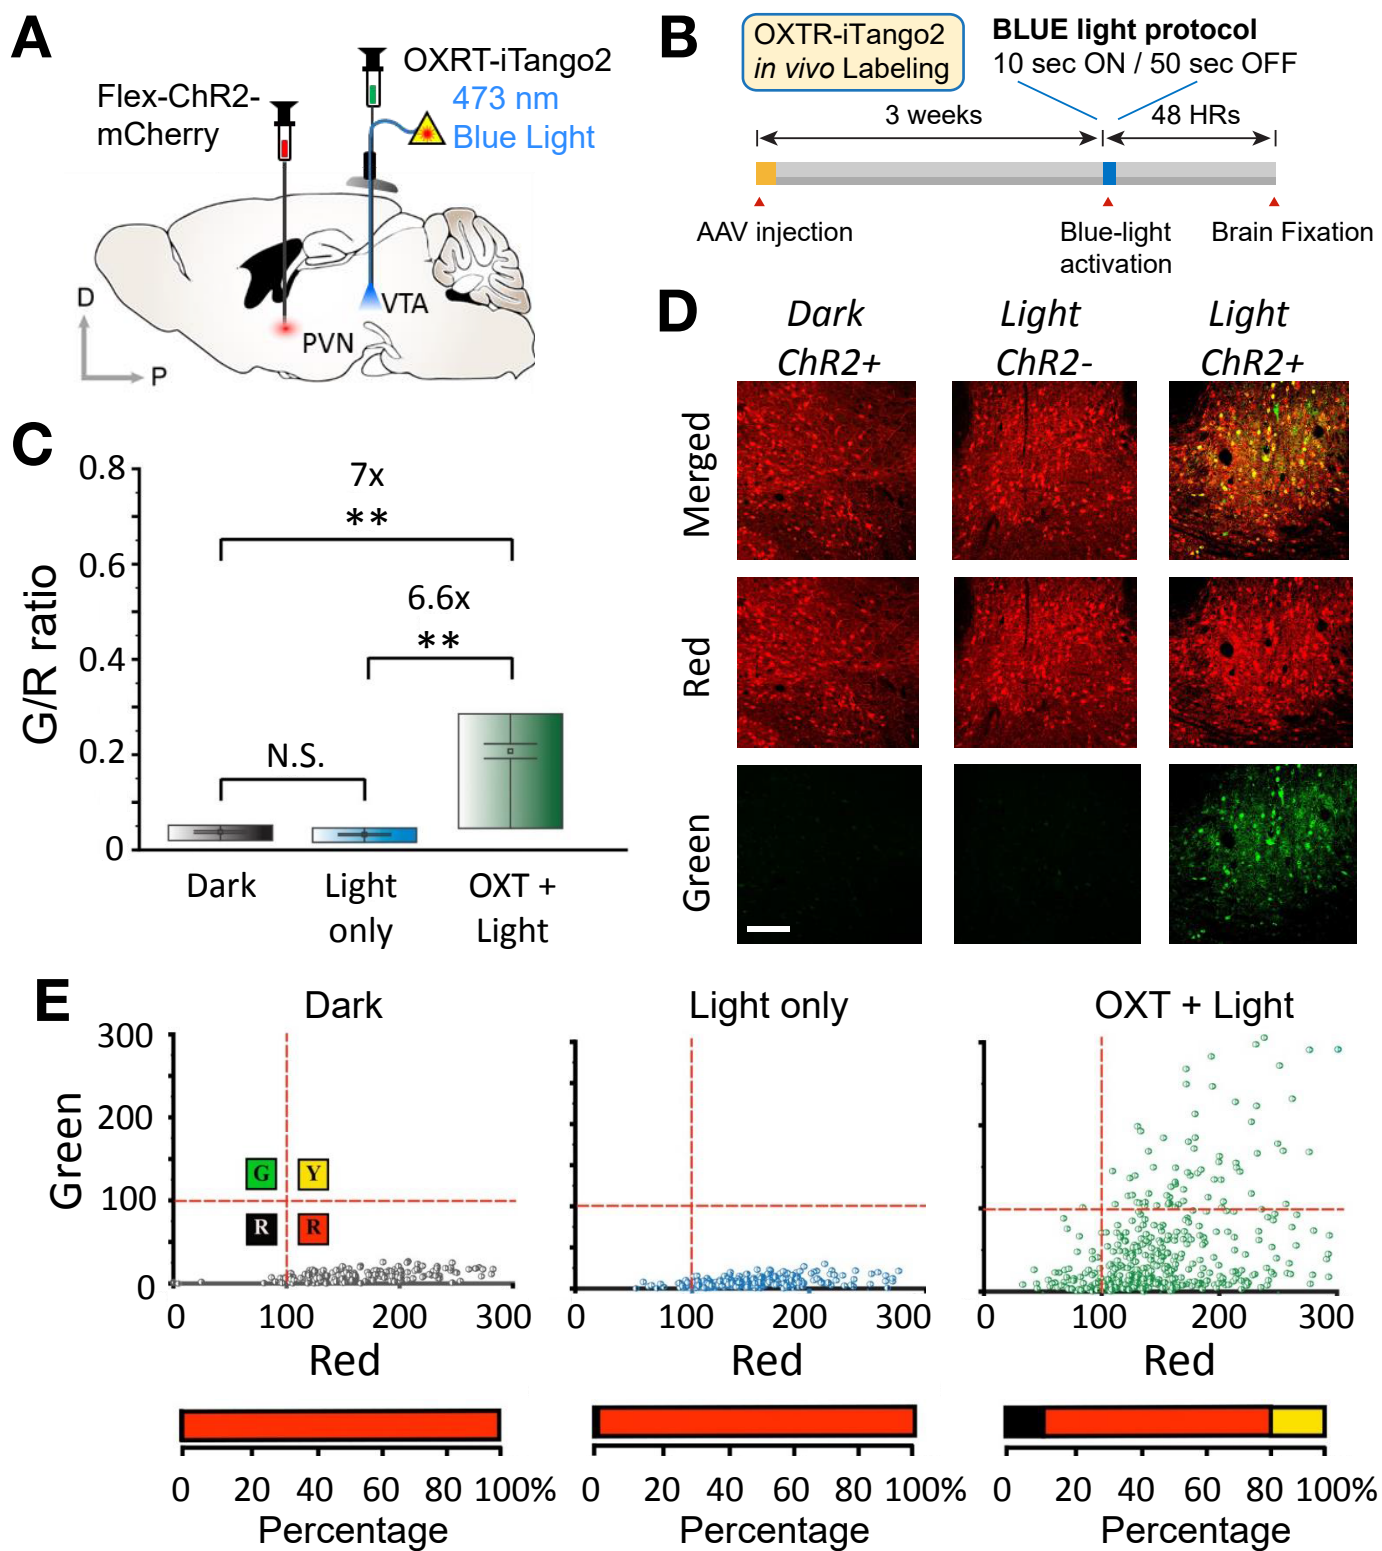



## Figure 5

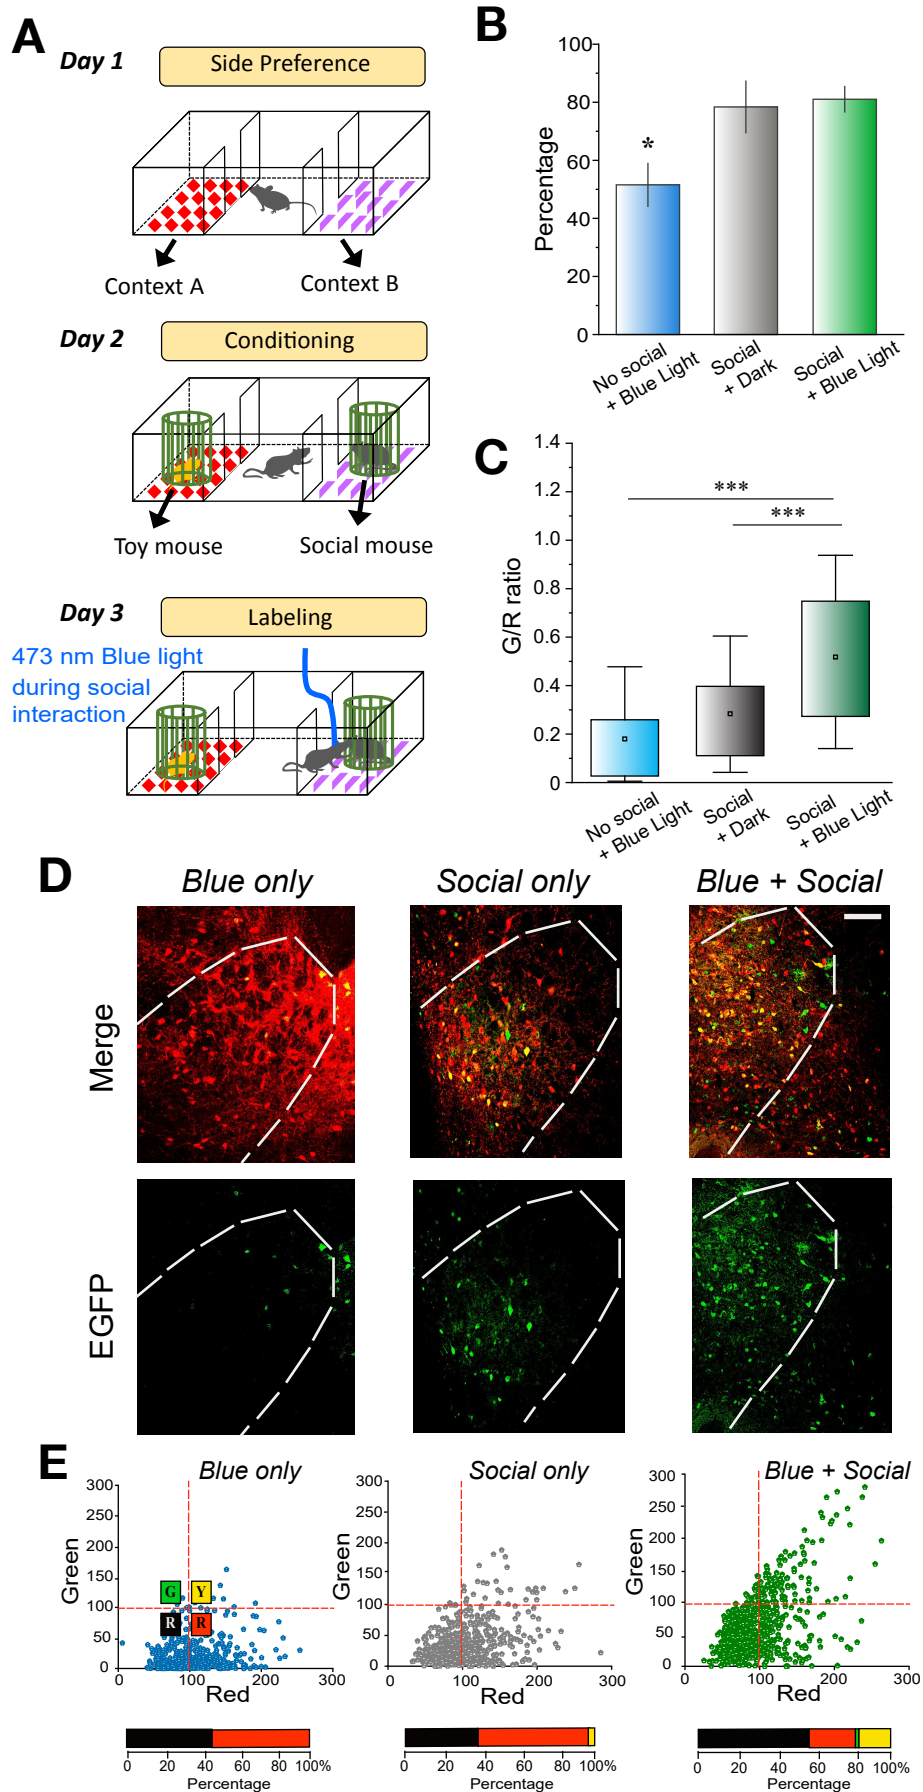

Source: http://biorxiv.org/content/10.1101/2020.07.14.202598v1.full.pdf
